# Supplementary material for: Ion association in aqueous and non-aqueous solutions probed by diffusion and electrophoretic NMR
Source: Royal Society of Chemistry journal article supplement (doi:10.1039/c4cp04446k), 2014-12-10
Supplement: c4cp04446k1.pdf [file c4cp04446k1.pdf]

## Electronic Supplementary Information for

### Ion association in aqueous and non-aqueous solutions probed by diffusion and electrophoretic NMR

*Marianne Giesecke<sup>a</sup>, Guillaume Mériguet<sup>b,c</sup>,  
Fredrik Hallberg<sup>a</sup>, Yuan Fang<sup>a</sup>, Peter Stilbs<sup>a</sup>, and István Furo<sup>a\*</sup>*

<sup>a</sup>Division of Applied Physical Chemistry, Department of Chemistry, KTH Royal Institute of  
Technology, SE-10044 Stockholm, Sweden

<sup>b</sup>Sorbonne Universités, UPMC Université Pierre et Marie Curie Paris 06, UMR 8234  
PHENIX, F-75005, Paris, France and <sup>c</sup>CNRS, UMR 8234,  
PHENIX, F-75005, Paris, France

\*Corresponding author, E-mail: furo@kth.se

#### eNMR measurements with varied water concentration

Additional eNMR experiments were performed in order to investigate the effect of the added water in all samples. The samples consisted of 2 mM tetramethylammonium bromide dissolved in either d<sub>6</sub>-DMSO, d<sub>3</sub>-acetonitrile, and d<sub>6</sub>-ethanol.

The water concentration in the solutions prepared without added water was estimated from <sup>1</sup>H NMR spectral integrals of the TMA<sup>+</sup> and solvent signals as well as HDO signal. The deuterated solvent did not contain any D<sub>2</sub>O, as was verified by the <sup>2</sup>H NMR spectra of the solvents. The salt was vacuum-dried overnight to keep the initial water content as low as possible. The effective charge of the TMA<sup>+</sup> ion was measured by eNMR and diffusion NMR as detailed in the main text. Then, the experiments were repeated but this time after having adjusted the water concentration to 120 ± 20 mM as used in all experiments. The obtained differences between nominal and effective charges are summarized in Table S1 below; corresponding more extensive data for d<sub>4</sub>-methanol are in the main text, see Fig. 5. As is

clear, the effect of the added water on the obtained charge difference is small, within the experimental error.

| Solvent name         | $p$ of TMA <sup>+</sup> without added water (solvent as purchased, water concentration indicated in parenthesis) | $p$ of TMA <sup>+</sup> with added water (120 ± 20 mM) |
|----------------------|------------------------------------------------------------------------------------------------------------------|--------------------------------------------------------|
| d6-dimethylsulfoxide | 0 (55 mM)                                                                                                        | 0.01                                                   |
| d3-acetonitrile      | 0.08 (21 mM)                                                                                                     | 0.08                                                   |
| d6-ethanol           | 0.13 (1.2 mM)                                                                                                    | 0.15                                                   |

**Table S1.**

**The obtained diffusion coefficients and electrophoretic mobilities for the TMA cation, TMA<sup>+</sup>, in the studied samples**

| Solvent                 | Anion                         | $D$ ( $10^{-11} \text{ m}^2 \text{ s}^{-1}$ ) <sup>1</sup> | $\mu$ ( $10^{-8} \text{ m}^2 \text{ V}^{-1} \text{ s}^{-1}$ ) <sup>2</sup> |
|-------------------------|-------------------------------|------------------------------------------------------------|----------------------------------------------------------------------------|
| D <sub>2</sub> O (2 mM) | SO <sub>4</sub> <sup>2-</sup> | 100.8                                                      | 3.90                                                                       |
|                         | F <sup>-</sup>                | 100.0                                                      | 3.86                                                                       |
|                         | Ac <sup>-</sup>               | 101.9                                                      | 4.10                                                                       |
|                         | Cl <sup>-</sup>               | 102.7±1.42                                                 | 3.96±0.065                                                                 |
|                         | Br <sup>-</sup>               | 103.2                                                      | 3.92                                                                       |
|                         | NO <sub>3</sub> <sup>-</sup>  | 100.9                                                      | 3.95                                                                       |
|                         | I <sup>-</sup>                | 102.7                                                      | 3.88                                                                       |
|                         | ClO <sub>4</sub> <sup>-</sup> | 101.8                                                      | 3.85                                                                       |
| d6-dimethylsulfoxide    | Ac <sup>-</sup>               | 43.2                                                       | 1.76                                                                       |
|                         | Cl <sup>-</sup>               | 43.8±0.23                                                  | 1.68±0.036                                                                 |
|                         | Br <sup>-</sup>               | 44.4                                                       | 1.71                                                                       |
|                         | NO <sub>3</sub> <sup>-</sup>  | 42.9                                                       | 1.63                                                                       |
|                         | I <sup>-</sup>                | 43.9                                                       | 1.73                                                                       |
| d3-acetonitrile         | F <sup>-</sup>                | 228.0                                                      | 8.32                                                                       |
|                         | Ac <sup>-</sup>               | 226.4                                                      | 8.30                                                                       |
|                         | Cl <sup>-</sup>               | 229.0±0.00                                                 | 8.23±0.024                                                                 |
|                         | Br <sup>-</sup>               | 231.6                                                      | 8.29                                                                       |
|                         | NO <sub>3</sub> <sup>-</sup>  | 234.4                                                      | 8.55                                                                       |
|                         | I <sup>-</sup>                | 234.6                                                      | 8.54                                                                       |
|                         | ClO <sub>4</sub> <sup>-</sup> | 230.7                                                      | 8.70                                                                       |
| d4-methanol             | SO <sub>4</sub> <sup>2-</sup> | 145.3                                                      | 4.74                                                                       |
|                         | F <sup>-</sup>                | 159.4                                                      | 6.36                                                                       |
|                         | Ac <sup>-</sup>               | 166.3                                                      | 6.30                                                                       |
|                         | Cl <sup>-</sup>               | 156.8±2.71                                                 | 6.15±0.078                                                                 |
|                         | Br <sup>-</sup>               | 162.2                                                      | 6.06                                                                       |
|                         | NO <sub>3</sub> <sup>-</sup>  | 161.4                                                      | 6.14                                                                       |
|                         | I <sup>-</sup>                | 157.3                                                      | 6.18                                                                       |
|                         | ClO <sub>4</sub> <sup>-</sup> | 160.0                                                      | 6.09                                                                       |
|                         | SO <sub>4</sub> <sup>2-</sup> | 54.5                                                       | 1.13                                                                       |

|                          |                               |           |           |
|--------------------------|-------------------------------|-----------|-----------|
| d6-ethanol               | F <sup>-</sup>                | 67.4      | 2.41      |
|                          | Ac <sup>-</sup>               | 66.9      | 2.35      |
|                          | Cl <sup>-</sup>               | 66.3±0.16 | 2.21±0.02 |
|                          | Br <sup>-</sup>               | 67.8      | 2.25      |
|                          | NO <sub>3</sub> <sup>-</sup>  | 66.5      | 2.27      |
| D <sub>2</sub> O (10 mM) | SO <sub>4</sub> <sup>2-</sup> | 100.4     | 3.53      |
|                          | F <sup>-</sup>                | 98.3      | 3.66      |
|                          | Ac <sup>-</sup>               | 95.2      | 3.60      |
|                          | Cl <sup>-</sup>               | 97.7      | 3.68      |
|                          | Br <sup>-</sup>               | 99.5      | 3.59      |
|                          | NO <sub>3</sub> <sup>-</sup>  | 97.8      | 3.72      |
|                          | I <sup>-</sup>                | 98.9      | 3.58      |
|                          | ClO <sub>4</sub> <sup>-</sup> | 97.8      | 3.64      |

**Table S2.**

<sup>1</sup>The diffusion experiments were measured at 298.95 K.

<sup>2</sup>The eNMR measurement was performed at 299.05 K. As previously mentioned, in the calculation of  $p$  (see Fig. 1), the measured diffusion coefficients were adjusted to 299.05 K using the known dependences of viscosity of the solvents. Note also that this dependence can be used to calculate the diffusion coefficient at 298.15 in order to compare it to the predicted value using Eq. (4).
